# Supplementary material
Source: PubMed Central journal article supplement (PMC8186288)
Supplement: JCH-16-270-s001.pdf [file JCH-16-270-s001.pdf]

Supplemental Table 1. Mean blood pressure and prevalence of hypertension among US adults  $\geq 80$  years of age in 1988-1994, 1999-2004, and 2005-2010 for people without (top panel) and with (bottom panel) impairments in activities of daily living.

|                                                            | Time period              |                          |                          | p-trend |
|------------------------------------------------------------|--------------------------|--------------------------|--------------------------|---------|
|                                                            | 1988 – 1994<br>(n=1,164) | 1999 – 2004<br>(n=1,026) | 2005 – 2010<br>(n=1,048) |         |
| <b>No ADL impairment</b>                                   |                          |                          |                          |         |
| Mean SBP, mm Hg                                            | 147.5 (1.30)             | 149.0 (1.03)             | 141.1 (0.93)             | <0.001  |
| Mean DBP, mm Hg                                            | 70.3 (0.68)              | 61.7 (0.92)              | 59.9 (0.61)              | <0.001  |
| SBP/DBP < 140/90 mm Hg                                     | 40.2                     | 40.5                     | 52.6                     | <0.001  |
| Taking antihypertensive medication (self-report), %        | 33.0                     | 45.8                     | 55.8                     | <0.001  |
| Number of antihypertensive medication classes <sup>†</sup> | 1.0 (0.05)               | 1.3 (0.06)               | 1.8 (0.05)               | <0.001  |
| Percent taking <sup>†</sup>                                |                          |                          |                          |         |
| 0 classes                                                  | 38.8                     | 29.5                     | 16.8                     | <0.001  |
| 1 classes                                                  | 32.9                     | 26.8                     | 25.9                     | 0.04    |
| 2 classes                                                  | 22.4                     | 26.6                     | 27.3                     | 0.19    |
| $\geq 3$ classes                                           | 5.9                      | 17.0                     | 30.0                     | <0.001  |
| <b><math>\geq 1</math> ADL impairment</b>                  |                          |                          |                          |         |
| Mean SBP, mm Hg                                            | 147.1 (1.38)             | 146.5 (1.68)             | 137.8 (1.35)             | <0.001  |
| Mean DBP, mm Hg                                            | 69.9 (0.91)              | 59.8 (1.34)              | 58.2 (1.10)              | <0.001  |
| SBP/DBP < 140/90 mm Hg                                     | 43.1                     | 44.5                     | 56.7                     | 0.001   |
| Taking antihypertensive medication (self-report), %        | 35.4                     | 47.9                     | 60.7                     | <0.001  |
| Number of antihypertensive medication classes <sup>†</sup> | 1.2 (0.07)               | 1.7 (0.09)               | 1.9 (0.08)               | <0.001  |
| Percent taking <sup>†</sup>                                |                          |                          |                          |         |
| 0 classes                                                  | 30.9                     | 19.5                     | 10.9                     | <0.001  |
| 1 classes                                                  | 34.3                     | 24.4                     | 27.0                     | 0.11    |
| 2 classes                                                  | 25.6                     | 32.5                     | 29.3                     | 0.44    |
| $\geq 3$ classes                                           | 9.3                      | 23.6                     | 32.9                     | <0.001  |

Numbers in table are mean (standard error) or percentage.

<sup>†</sup> Among those with hypertension.

ADL: Activities of daily living; SBP: Systolic blood pressure; DBP: Diastolic blood pressure

Supplemental Table 2. Number of US adults  $\geq 80$  years of age with hypertension in 1988-1994, 1999-2004, and 2005-2010.

|                 | Time period              |                          |                          |
|-----------------|--------------------------|--------------------------|--------------------------|
|                 | 1988 – 1994<br>(n=1,165) | 1999 – 2004<br>(n=1,029) | 2005 – 2010<br>(n=1,050) |
| Hypertension    |                          |                          |                          |
| All             | 4.21 (3.41-5.01)         | 5.74 (4.90-6.58)         | 7.27 (6.25-8.29)         |
| Uncontrolled BP | 3.58 (2.84-4.32)         | 4.37 (3.70-5.04)         | 4.38 (3.77-4.99)         |
| Controlled BP   | 0.62 (0.48-0.76)         | 1.37 (1.06-1.68)         | 2.89 (2.32-3.46)         |

Numbers in table are US adults  $\geq 80$  years of age in millions (95% confidence interval)

BP: Blood pressure; Uncontrolled BP: Systolic blood pressure/Diastolic blood pressure  $\geq 140/90$  mm Hg; Controlled BP: Systolic blood pressure/Diastolic blood pressure  $< 140/90$  mm Hg;

Supplemental Table 3. Prevalence of systolic blood pressure <120 mm Hg, <130 mm Hg, < 140 mm Hg, < 150 mm Hg and < 160 mm Hg and diastolic blood pressure < 60 mm Hg, < 70 mm Hg, < 80 mm Hg, < 90 mm Hg and < 100 mm Hg among US adults ≥ 80 years of age in 1988-1994, 1999-2004, and 2005-2010.

|                    | Time period              |                          |                          | p-trend |
|--------------------|--------------------------|--------------------------|--------------------------|---------|
|                    | 1988 – 1994<br>(n=1,164) | 1999 – 2004<br>(n=1,026) | 2005 – 2010<br>(n=1,048) |         |
| SBP < 120 mm Hg, % | 12.5                     | 11.9                     | 19.0                     | <0.001  |
| SBP < 130 mm Hg, % | 24.9                     | 25.2                     | 35.0                     | <0.001  |
| SBP < 140 mm Hg, % | 41.5                     | 41.9                     | 54.1                     | <0.001  |
| SBP < 150 mm Hg, % | 58.4                     | 54.4                     | 70.3                     | <0.001  |
| SBP < 160 mm Hg, % | 71.4                     | 69.3                     | 82.1                     | <0.001  |
| DBP < 60 mm Hg, %  | 15.5                     | 36.1                     | 48.9                     | <0.001  |
| DBP < 70 mm Hg, %  | 46.6                     | 65.7                     | 74.2                     | <0.001  |
| DBP < 80 mm Hg, %  | 78.7                     | 89.2                     | 91.3                     | <0.001  |
| DBP < 90 mm Hg, %  | 93.9                     | 97.2                     | 97.9                     | <0.001  |
| DBP < 100 mm Hg, % | 99.0                     | 99.2                     | 99.3                     | 0.79    |
